# Supplementary material for: Timapiprant, a prostaglandin D2 receptor antagonist, ameliorates pathology in a rat Alzheimer’s model
Source: Life Sci Alliance. 2022 Sep 27;5(12):e202201555. doi: 10.26508/lsa.202201555 (PMC9515385; doi:10.26508/lsa.202201555)
Supplement: Supplementary file 1 [file LSA-2022-01555_SdataF2.xlsx]

## Sheet: PG analysis (Fig 2)
	PGD2							PGE2							PGJ2							TxB2
	Female WT 11 month	Female Tg-AD 11month	Male WT 11 month	Male Tg-AD 11month	All WT	All Tg-AD		Female WT 11 month	Female Tg-AD 11month	Male WT 11 month	Male Tg-AD 11month	All WT	All Tg-AD		Female WT 11 month	Female Tg-AD 11month	Male WT 11 month	Male Tg-AD 11month	All WT	All Tg-AD		Female WT 11 month	Female Tg-AD 11month	Male WT 11 month	Male Tg-AD 11month	All WT	All Tg-AD
	40.16	44.33	34	19.9	40.16	44.33		4.23	1.45	1.9	1	4.23	1.45		1.57	1.3	1.7	1.9	1.57	1.3		14.24	9.61	15.4	10.6	14.24	9.61
	41.04	23.16	31.2	12.7	41.04	23.16		4.57	0.79	2	0.9	4.57	0.79		2.01	1.5	1.9	0.7	2.01	1.5		10.86	5.82	12.8	6.1	10.86	5.82
	27.45	28.21	27.6	28.4	27.45	28.21		4.47	0.88	1.3	4.7	4.47	0.88			2.4	1.9	1.5		2.4		18.39	8.06	12.4	10	18.39	8.06
	51.63	16.34	18.2	22.3	51.63	16.34		2.96	1.22	1	1.2	2.96	1.22		3.83	2	1.3	0.7	3.83	2		18.57	4.37	8.4	11.9	18.57	4.37
	68.54	18.39	20.4	13	68.54	18.39		5.3	0.88	1.1	1	5.3	0.88		3.98	1	1.6		3.98	1		19.99	5.53	9.4	6	19.99	5.53
	42.1	24.4	25	12.3	42.1	24.4		1.9	0.5	1.4	0.7	1.9	0.5		2.2	1.2	1.5		2.2	1.2		18.8	12.7	12.6	7.1	18.8	12.7
	29.7	28.1	45.5	25.9	29.7	28.1		1.1	3.2	1.1	1	1.1	3.2		1	1.6	4.8	1.1	1	1.6		13.6	8.7	20.4	10.8	13.6	8.7
	45.6	76	68.3	14.4	45.6	76		1.7	5.4	3.8	0.8	1.7	5.4		2.8	1	1.4	0.7	2.8	1		16.9	29.6	24.9	8.7	16.9	29.6
	33.4	41.2	74.6	61.3	33.4	41.2		1	2.7	5.1	2.9	1	2.7		2.2	0.9	1.2	0.9	2.2	0.9		18.2	16.3	25	21.5	18.2	16.3
	47.3	24.6	80.3	59.8	47.3	24.6		3	1.1	3.6	4.1	3	1.1		3.2	2.6	1.7	1.1	3.2	2.6		17.2	14.1	29.5	5.6	17.2	14.1
	56	22.3	94.7	79.6	56	22.3		4.2	0.8	7.9	3.3	4.2	0.8		3.1	1.9	2.1	1.3	3.1	1.9		18.1	13.7	31.2	22.5	18.1	13.7
	20.2	33.6	110.2	82.6	20.2	33.6		2.1	1.3	11.1	4.2	2.1	1.3		1	2.4	2.4	1.4	1	2.4		7.6	14.6	47.5	28.4	7.6	14.6
	86.9	47.9	60.8	91.2	86.9	47.9		4.6	1.4	3.4	5.1	4.6	1.4		2.6	1.3	1.5	1.6	2.6	1.3		13	21.1	18.4	33.4	13	21.1
	57.4	54.6		64.6	57.4	54.6		4.8	2.2		4.5	4.8	2.2		1.4			1.2	1.4	1.9		10.1	22.3		14.4	10.1	22.3
	52.4	97.4			52.4	97.4		6.9	6.3			6.9	6.3		1.1				1.1	0.7		10.3	8.1			10.3	8.1
	49.8	72.7			49.8	72.7		3.7	3.9			3.7	3.9		1.1				1.1	1.5		11.2	21.9			11.2	21.9
	38.8	88.7			38.8	88.7		2.7	4.2			2.7	4.2		0.9				0.9	0.7		9.9	29.8			9.9	29.8
	42.5	53.6			42.5	53.6		1.4	4.3			1.4	4.3		1.2				1.2			11.8	22.7			11.8	22.7
					34	19.9						1.9	1						1.7							15.4	10.6
					31.2	12.7						2	0.9						1.9	1.1						12.8	6.1
					27.6	28.4						1.3	4.7						1.9	0.7						12.4	10
					18.2	22.3						1	1.2						1.3	0.9						8.4	11.9
					20.4	13						1.1	1						1.6	1.1						9.4	6
					25	12.3						1.4	0.7						1.5	1.3						12.6	7.1
					45.5	25.9						1.1	1						4.8	1.4						20.4	10.8
					68.3	14.4						3.8	0.8						1.4	1.6						24.9	8.7
					74.6	61.3						5.1	2.9						1.2	1.2						25	21.5
					80.3	59.8						3.6	4.1						1.7							29.5	5.6
					94.7	79.6						7.9	3.3						2.1							31.2	22.5
					110.2	82.6						11.1	4.2						2.4							47.5	28.4
					60.8	91.2						3.4	5.1						1.5							18.4	33.4
						64.6							4.5														14.4
