# Supplementary material for: Timapiprant, a prostaglandin D2 receptor antagonist, ameliorates pathology in a rat Alzheimer’s model
Source: Life Sci Alliance. 2022 Sep 27;5(12):e202201555. doi: 10.26508/lsa.202201555 (PMC9515385; doi:10.26508/lsa.202201555)
Supplement: Supplementary file 2 [file LSA-2022-01555_TableS1.xlsx]

## Sheet: Sup Tables
Supplemental Table 1: DP1 levels (% signal) across hippocampal regions. Values represent the percent of the signal (DP1+) detected within a specific area (= 100%, μm2) as explained under materials and methods. Abbreviations: DP1, prostaglandin D2 receptor 1; WT, wild type; Tg-AD, transgenic rat model of Alzheimer’s disease; SEM, standard error of the mean; SB, subiculum; CA, cornu ammonis; DG, de…
	WT mean ± SEM n = 12	Tg-AD mean ± SEM n = 11	p-value	t-statistics
SB	3.88 ± 0.16	4.05 ± 0.23	0.27	t=0.15, df=17.08
CA1	3.50 ± 0.20	3.97 ± 0.22	0.06	t=1.58, df=20.76
CA3	3.91 ± 0.16	4.24 ± 0.25	0.13	t=1.14, df=17.23
DG	4.33 ± 0.23	4.63 ± 0.16	0.15	t=1.06, df=19.31
HL	5.22 ± 0.22	5.34 ± 0.22	0.36	t=0.36, df=20.99
