# Supplementary material for: Timapiprant, a prostaglandin D2 receptor antagonist, ameliorates pathology in a rat Alzheimer’s model
Source: Life Sci Alliance. 2022 Sep 27;5(12):e202201555. doi: 10.26508/lsa.202201555 (PMC9515385; doi:10.26508/lsa.202201555)
Supplement: Supplementary file 5 [file LSA-2022-01555_TableS4.xlsx]

## Sheet: Sup Tables
Supplemental Table 4: Astrocyte levels (GFAP, % signal) across hippocampal regions. Values represent the percent of the signal (GFAP+) detected within a specific area (= 100%, μm2) as explained under materials and methods. Abbreviations: GFAP, Glial fibrillary acidic protein; WT, wild type; Tg-AD, transgenic rat model of Alzheimer’s disease; SEM, standard error of the mean; SB, subiculum; CA, cor…
	WT mean ± SEM n = 12	Tg-AD mean ± SEM n = 11	p-value	t-statistics
SB	4.42 ± 0.13	4.56 ± 0.20	0.28	t=0.58, df=17.13
CA1	4.36 ± 0.11	4.61 ± 0.17	0.11	t=1.26, df=17.37
CA3	4.45 ± 0.15	4.65 ± 0.16	0.23	t=0.75, df=20.47
DG	4.47 ± 0.12	4.71 ± 0.12	0.08	t=1.44, df=20.81
HL	4.65 ± 0.21	4.99 ± 0.20	0.13	t=1.15, df=21.00
