# Supplementary material for: Timapiprant, a prostaglandin D2 receptor antagonist, ameliorates pathology in a rat Alzheimer’s model
Source: Life Sci Alliance. 2022 Sep 27;5(12):e202201555. doi: 10.26508/lsa.202201555 (PMC9515385; doi:10.26508/lsa.202201555)
Supplement: Supplementary file 6 [file LSA-2022-01555_SdataF4.xlsx]

## Sheet: Fig4
HL region, Dentate Gyrus
	DP1 % Area				Microglia/nm^2			DP1 & Microglia/nm^2
	WT	Tg-AD			WT	Tg-AD		WT	Tg-AD
	4.86325	4.351			29.9924	41.775		37.7682	38.653
	4.87433	4.81967			35.6318	46.7771		32.2595	45.7783
	4.6785	3.8445			34.2423	22.6208		36.7787	18.3949
	4.102	6.2065			29.4138	69.1218		28.0768	67.8465
	6.0575	6.21			40.6945	69.6223		29.1393	70.3454
	5.405	5.557			35.2563	86.7299		27.9665	80.3158
	6.245	5.729			43.3933	67.528		37.4864	54.8278
	6.107	5.37133			47.1789	68.4251		38.8343	46.1956
	4.26967	5.5545			38.0349	63.717		27.9155	64.9602
	5.8235	5.4665			50.8753	50.3341		48.4398	41.6745
	4.416	5.60367			46.692	61.818		28.9918	48.9196
	5.8455				57.0505			50.4447
	Ramified microglia			Reactive Microglia			Ameboid Microglia
	WT	Tg-AD		WT	Tg-AD		WT	Tg-AD
	28.3262	33.7471		1.11083	4.01397		0	0.892
	27.4237	29.7975		3.75406	9.4886		1.08	6.49
	29.423	18.3949		3.2974	0		0.761	0
	27.542	42.3403		0.534796	17.5993		0	7.91
	23.8641	48.3431		4.52161	13.9451		0.754	4.65
	24.3878	60.5157		3.18102	12.2705		0.398	7.53
	33.397	32.525		3.40785	13.3198		0.682	8.98
	28.2431	29.7551		7.22125	9.84118		3.37	6.6
	26.1708	46.0006		1.39577	10.5677		0.349	3.73
	43.5688	33.8267		4.0592	5.68288		0.812	2.16
	22.2779	35.5493		4.57765	9.28057		2.14	4.09
	33.9301			9.00798			7.51
