# Supplementary material for: Timapiprant, a prostaglandin D2 receptor antagonist, ameliorates pathology in a rat Alzheimer’s model
Source: Life Sci Alliance. 2022 Sep 27;5(12):e202201555. doi: 10.26508/lsa.202201555 (PMC9515385; doi:10.26508/lsa.202201555)
Supplement: Supplementary file 12 [file LSA-2022-01555_SdataFS2_S3_S4_S5.xlsx]

## Sheet: RNAseq (Supplemental)
MALES
Gene_symbol	NAME	Foldchange	PValue	FDR	MTg1	MTg2	MTg3	MTg4	MTg5	MWT1	MWT2	MWT3	MWT4	MWT5
Cbr1	carbonyl reductase 1	1.10318	0.249777	1	37.5161	41.9434	34.9198	40.0984	39.4032	29.2197	40.4705	32.9143	41.5576	31.5777
Hpgd	hydroxyprostaglandin dehydrogenase 15 (NAD)	1.17185	0.561835	1	3.17534	3.13312	0.918943	3.18339	4.45141	2.5666	2.98204	3.32912	0.7964	2.98427
Hpgds	hematopoietic prostaglandin D synthase	-1.03995	0.890482	1	0.470421	0.707479	2.26673	1.46926	1.04416	1.18458	1.01176	1.00502	1.81	1.17983
Pla2g4a	phospholipase A2, group IVA (cytosolic, calcium-dependent)	-1.0213	0.877483	1	7.76195	7.98441	9.12816	6.91775	6.70459	8.02884	7.18884	7.41201	10.2808	6.45435
Ppara	peroxisome proliferator activated receptor alpha	-1.08903	0.600479	1	4.88062	3.38579	2.57304	3.8568	3.84689	4.34347	3.94055	4.20851	3.1132	4.5805
Ppard	peroxisome proliferator-activated receptor delta	-1.17683	0.109671	1	33.1059	41.2865	55.7492	42.3635	38.6338	49.3576	41.429	47.1102	61.3952	49.2751
Pparg	peroxisome proliferator-activated receptor gamma	1.06932	0.872358	1	0.235211	0.303205	0.245051	0.183657	0.329734	0.197431	0.266253	0.188441	0.2896	0.277606
Ppargc1a	peroxisome proliferator-activated receptor gamma, coactivator 1 alpha	-1.07881	0.506835	1	17.4644	14.7055	16.0509	14.9987	14.4533	17.7688	15.1764	16.0175	15.4212	19.4324
Ppargc1b	peroxisome proliferator-activated receptor gamma, coactivator 1 beta	1.00007	0.999657	1	4.88062	4.95235	5.81997	4.22411	4.78114	4.34347	5.11206	4.52258	4.8508	5.82973
Pprc1	peroxisome proliferator-activated receptor gamma, coactivator-related 1	1.06	0.474037	1	28.8721	28.0465	27.7521	26.5078	30.4454	25.666	27.8501	28.643	24.3264	27.0666
Ptgdr	prostaglandin D2 receptor	3.29614	0.163603	1	0.0588027	0	0.306314	0.061219	0.109911	0	0	0	0.1448	0
Ptgdr2	prostaglandin D2 receptor 2	-1.15673	0.66698	1	0.470421	0.303205	1.22526	0.244876	0.329734	0.592292	0.585757	0.502509	0.7964	0.485811
Ptgdrl	prostaglandin D2 receptor-like	-1.87428	0.296435	1	0.588027	0.454808	0	0.306095	0.329734	0.855533	0.905261	0.439695	0.2172	0.763417
Ptgds	prostaglandin D2 synthase (brain)	1.83126	0.211616	1	244.266	2490.93	501.743	344.234	345.506	226.321	286.329	211.305	1111.63	308.698
Ptger1	prostaglandin E receptor 1 (subtype EP1)	-1.31042	0.0269919	0.824549	6.35069	7.22639	6.67765	6.42799	6.26494	9.21343	8.04085	8.2914	10.4256	7.28717
Ptger2	prostaglandin E receptor 2 (subtype EP2)	-1.01811	0.946305	1	0.88204	0.859082	0.980205	1.16316	0.989201	1.71107	0.692258	0.942204	0.5068	1.11043
Ptger3	prostaglandin E receptor 3 (subtype EP3)	1.5577	0.0952365	1	1.35246	1.26336	2.32799	1.71413	1.26398	1.51363	1.11826	0.502509	1.2308	0.694016
Ptger4	prostaglandin E receptor 4 (subtype EP4)	1.94075	0.0823898	1	0.294013	0.454808	0.85768	0.428533	0.164867	0.13162	0.106501	0.188441	0.4344	0.277606
Ptges	prostaglandin E synthase	1.14957	0.712218	1	0.411619	2.12244	0.735154	1.16316	0.87929	0.658102	0.79876	0.69095	1.9548	0.555213
Ptges2	prostaglandin E synthase 2	-1.0023	0.975309	1	49.3943	43.6616	44.8444	45.7918	46.9871	46.462	47.3931	48.0524	42.716	46.4991
Ptges3	prostaglandin E synthase 3 (cytosolic)	-1.0273	0.747842	1	167.47	155.898	122.158	162.414	173.055	159.063	172.585	172.361	141.397	156.848
Ptges3l1	prostaglandin E synthase 3-like 1	-1.06396	0.581512	1	17.1704	16.2215	13.1102	18.3657	16.5966	16.979	19.756	17.4622	12.9596	19.4324
Ptgfr	prostaglandin F receptor	1.89704	0.246059	1	0.470421	3.8406	1.16399	0.367314	0.274778	0.526482	0.213003	0.565322	1.448	0.485811
Ptgfrn	prostaglandin F2 receptor inhibitor	-1.05638	0.70217	1	27.108	40.0736	55.5654	47.9957	29.5112	36.7221	29.2878	39.1329	61.1056	45.3886
Ptgir	prostaglandin I2 (prostacyclin) receptor (IP)	-1.65399	0.312718	1	0	0.202137	0.245051	0.061219	0.0549556	0.197431	0.213003	0.0628136	0.2172	0.277606
Ptgis	prostaglandin I2 (prostacyclin) synthase	1.2571	0.50825	1	1.41126	2.67831	2.20546	1.34682	1.15407	1.11877	1.01176	1.19346	2.172	1.52683
Ptgr1	prostaglandin reductase 1	1.0266	0.938798	1	0.823238	1.56656	0.980205	1.16316	0.824334	0.855533	0.745509	1.00502	1.9548	0.694016
Ptgr2	prostaglandin reductase 2	-1.16336	0.0909136	1	77.2079	73.4768	103.044	98.7462	88.1488	110.166	81.367	94.2204	120.691	106.254
Ptgs1	prostaglandin-endoperoxide synthase 1	-1.13273	0.328348	1	17.7584	15.3624	25.6691	13.5294	15.2777	18.7559	16.0284	18.0275	28.1636	18.322
Ptgs2	prostaglandin-endoperoxide synthase 2	-1.20447	0.473	1	20.8161	21.4265	7.35154	23.4469	19.5092	20.6644	35.7844	30.4646	5.068	19.4324
Sox2	SRY (sex determining region Y)-box 2	-1.28562	0.0105241	0.549924	88.7921	64.7343	112.846	96.6036	79.3559	122.802	99.4189	102.261	124.962	119.163
Tbxa2r	thromboxane A2 receptor	-1.50943	0.0761494	1	0.88204	0.656945	1.53157	0.979504	0.989201	1.18458	1.06501	1.75878	1.81	1.80444
Tbxas1	thromboxane A synthase 1, platelet	-1.02159	0.906023	1	3.70457	3.03205	7.65785	4.34655	3.79194	5.00157	4.26005	3.706	5.792	4.2335
FEMALES
Gene_symbol	NAME	Foldchange	PValue	FDR	FTg1	FTg2	FTg3	FTg4	FTg5	FWT1	FWT2	FWT3	FWT4	FWT5
Cbr1	carbonyl reductase 1	-1.10763	0.376823	1	36.3612	38.3334	36.8025	38.2463	40.3635	59.0034	33.4737	39.5281	42.9158	35.7796
Hpgd	hydroxyprostaglandin dehydrogenase 15 (NAD)	1.26266	0.358171	1	3.3413	3.99307	3.89829	3.48291	3.4882	0.913148	4.02924	3.21423	2.35873	3.85229
Hpgds	hematopoietic prostaglandin D synthase	1.30712	0.407733	1	1.76892	1.96582	0.792872	2.16861	0.719788	1.8263	0.867836	0.752266	1.04832	1.16736
Pla2g4a	phospholipase A2, group IVA (cytosolic, calcium-dependent)	-1.09233	0.59896	1	6.02744	7.74041	6.01262	7.82013	6.03515	8.99099	5.8269	8.68525	6.68306	6.59559
Ppara	peroxisome proliferator activated receptor alpha	-1.01175	0.955984	1	3.60336	4.11593	3.56793	3.74577	3.10063	2.59896	4.64912	3.351	4.45538	3.26861
Ppard	peroxisome proliferator-activated receptor delta	-1.01129	0.903739	1	35.575	36.1219	40.5026	39.1663	38.5364	37.2283	40.1684	38.4339	37.6741	38.5229
Pparg	peroxisome proliferator-activated receptor gamma	1.12928	0.769395	1	0.196547	0.307159	0.264291	0.394292	0.221473	0.0702421	0.185965	0.205163	0.393121	0.350208
Ppargc1a	peroxisome proliferator-activated receptor gamma, coactivator 1 alpha	-1.06122	0.614675	1	22.4064	19.781	17.3771	19.1889	16.6105	16.7879	20.6421	16.755	22.801	24.106
Ppargc1b	peroxisome proliferator-activated receptor gamma, coactivator 1 beta	1.01166	0.950317	1	7.79637	5.03741	9.64661	5.25723	5.5922	7.51591	5.45497	5.53941	7.99347	6.42049
Pprc1	peroxisome proliferator-activated receptor gamma, coactivator-related 1	1.07014	0.471048	1	31.9717	28.5044	34.3578	31.6748	35.8787	27.6052	29.9403	30.8429	29.9428	33.3865
Ptgdr	prostaglandin D2 receptor	-3.00634	0.186787	1	0.131031	0	0	0	0	0.140484	0	0	0.327601	0
Ptgdr2	prostaglandin D2 receptor 2	-1.16807	0.675573	1	0.196547	0.245727	0.396436	0.657153	0.276842	0.421453	0.495906	0.410327	0.327601	0.408577
Ptgdrl	prostaglandin D2 receptor-like	1.64709	0.304205	1	0.393094	0.921477	0.594654	0.98573	0.66442	0	0.619883	0.752266	0	0.758785
Ptgds	prostaglandin D2 synthase (brain)	-1.49323	0.0696487	1	202.509	209.114	163.398	181.769	189.803	327.258	149.702	131.852	634.76	169.968
Ptger1	prostaglandin E receptor 1 (subtype EP1)	-1.02262	0.90158	1	5.76538	5.34457	4.16258	6.37439	5.25999	6.46228	5.20701	4.99231	6.02786	4.84455
Ptger2	prostaglandin E receptor 2 (subtype EP2)	1.00265	0.993639	1	0.655157	1.96582	1.12324	1.57717	0.387578	1.12387	1.23977	1.02582	1.17936	1.10899
Ptger3	prostaglandin E receptor 3 (subtype EP3)	-1.09361	0.739398	1	1.44135	1.53579	1.51967	1.51145	1.052	1.75605	1.67368	1.02582	1.37593	1.86778
Ptger4	prostaglandin E receptor 4 (subtype EP4)	-1.10969	0.779605	1	0.524126	0.430023	0.198218	0.197146	0.387578	0.491695	0.309941	0.410327	0.262081	0.466945
Ptges	prostaglandin E synthase	-1.85821	0.0893597	1	0.262063	0.798613	0.198218	0.920015	0.941262	1.8263	1.42573	1.0942	0.655202	0.875521
Ptges2	prostaglandin E synthase 2	1.03118	0.759943	1	42.0611	47.0568	56.6904	47.5779	46.5094	38.4224	50.8924	51.6328	43.2434	48.3871
Ptges3	prostaglandin E synthase 3 (cytosolic)	1.02244	0.779316	1	162.02	164.023	182.955	165.537	173.248	157.413	176.171	169.875	164.259	161.446
Ptges3l1	prostaglandin E synthase 3-like 1	-1.01082	0.925594	1	16.9031	15.2351	14.8664	15.6403	18.7145	16.5069	16.8608	15.1821	18.1491	15.5843
Ptgfr	prostaglandin F receptor	-1.08011	0.831674	1	0.262063	0.552886	0.396436	0.788584	0.553683	0.772664	0.37193	0.273551	0.524162	0.817153
Ptgfrn	prostaglandin F2 receptor inhibitor	-1.41845	0.0268992	1	33.8716	32.5589	32.7721	34.6977	29.013	80.357	34.8994	28.5861	50.7127	36.5968
Ptgir	prostaglandin I2 (prostacyclin) receptor (IP)	-1.18639	0.734421	1	0.196547	0.184295	0.0660727	0.262861	0.166105	0.561937	0.123977	0	0.196561	0.175104
Ptgis	prostaglandin I2 (prostacyclin) synthase	-1.13017	0.699904	1	0.91722	1.96582	1.25538	0.8543	0.609052	1.47508	1.23977	0.683878	1.70353	1.22573
Ptgr1	prostaglandin reductase 1	1.34928	0.360768	1	0.786188	1.22864	0.594654	0.788584	1.16273	0.913148	0.619883	0.410327	0.982804	0.466945
Ptgr2	prostaglandin reductase 2	1.02879	0.757189	1	83.7946	73.9025	72.68	70.184	62.7323	84.3608	68.807	63.1219	70.1722	66.6563
Ptgs1	prostaglandin-endoperoxide synthase 1	1.06691	0.61175	1	19.7857	18.7981	17.5753	16.1003	16.2783	23.4609	16.1169	14.9085	13.9558	14.592
Ptgs2	prostaglandin-endoperoxide synthase 2	-1.09132	0.604119	1	25.9442	22.1769	16.9146	16.1003	27.0751	10.3958	25.1052	28.4493	30.4014	23.7558
Sox2	SRY (sex determining region Y)-box 2	-1.0559	0.636297	1	93.3599	79.7999	72.6139	66.9639	63.3414	112.949	76.7415	61.549	76.2	69.6915
Tbxa2r	thromboxane A2 receptor	-1.23349	0.548843	1	0.589641	1.10577	0.991091	1.77431	0.553683	2.59896	0.991812	0.889041	0.786243	0.933889
Tbxas1	thromboxane A synthase 1, platelet	1.1933	0.382027	1	3.93094	3.44018	3.70007	3.81149	4.26336	4.0038	2.91345	3.07745	3.21049	2.86004
