# Supplementary material for: Timapiprant, a prostaglandin D2 receptor antagonist, ameliorates pathology in a rat Alzheimer’s model
Source: Life Sci Alliance. 2022 Sep 27;5(12):e202201555. doi: 10.26508/lsa.202201555 (PMC9515385; doi:10.26508/lsa.202201555)
Supplement: Supplementary file 14 [file LSA-2022-01555_SdataF7.xlsx]

## Sheet: Fig 7 Rnaseq Female WT
Gene_symbol	NAME	FWT1	FWT2	FWT3	FWT4	FWT5
Cbr1	carbonyl reductase 1	59.0034	33.4737	39.5281	42.9158	35.7796
Hpgd	hydroxyprostaglandin dehydrogenase 15 (NAD)	0.913148	4.02924	3.21423	2.35873	3.85229
Hpgds	hematopoietic prostaglandin D synthase	1.8263	0.867836	0.752266	1.04832	1.16736
Pla2g4a	phospholipase A2, group IVA (cytosolic, calcium-dependent)	8.99099	5.8269	8.68525	6.68306	6.59559
Ppara	peroxisome proliferator activated receptor alpha	2.59896	4.64912	3.351	4.45538	3.26861
Ppard	peroxisome proliferator-activated receptor delta	37.2283	40.1684	38.4339	37.6741	38.5229
Pparg	peroxisome proliferator-activated receptor gamma	0.0702421	0.185965	0.205163	0.393121	0.350208
Ppargc1a	peroxisome proliferator-activated receptor gamma, coactivator 1 alpha	16.7879	20.6421	16.755	22.801	24.106
Ppargc1b	peroxisome proliferator-activated receptor gamma, coactivator 1 beta	7.51591	5.45497	5.53941	7.99347	6.42049
Pprc1	peroxisome proliferator-activated receptor gamma, coactivator-related 1	27.6052	29.9403	30.8429	29.9428	33.3865
Ptgdr	prostaglandin D2 receptor	0.140484	0	0	0.327601	0
Ptgdr2	prostaglandin D2 receptor 2	0.421453	0.495906	0.410327	0.327601	0.408577
Ptgdrl	prostaglandin D2 receptor-like	0	0.619883	0.752266	0	0.758785
Ptgds	prostaglandin D2 synthase (brain)	327.258	149.702	131.852	634.76	169.968
Ptger1	prostaglandin E receptor 1 (subtype EP1)	6.46228	5.20701	4.99231	6.02786	4.84455
Ptger2	prostaglandin E receptor 2 (subtype EP2)	1.12387	1.23977	1.02582	1.17936	1.10899
Ptger3	prostaglandin E receptor 3 (subtype EP3)	1.75605	1.67368	1.02582	1.37593	1.86778
Ptger4	prostaglandin E receptor 4 (subtype EP4)	0.491695	0.309941	0.410327	0.262081	0.466945
Ptges	prostaglandin E synthase	1.8263	1.42573	1.0942	0.655202	0.875521
Ptges2	prostaglandin E synthase 2	38.4224	50.8924	51.6328	43.2434	48.3871
Ptges3	prostaglandin E synthase 3 (cytosolic)	157.413	176.171	169.875	164.259	161.446
Ptges3l1	prostaglandin E synthase 3-like 1	16.5069	16.8608	15.1821	18.1491	15.5843
Ptgfr	prostaglandin F receptor	0.772664	0.37193	0.273551	0.524162	0.817153
Ptgfrn	prostaglandin F2 receptor inhibitor	80.357	34.8994	28.5861	50.7127	36.5968
Ptgir	prostaglandin I2 (prostacyclin) receptor (IP)	0.561937	0.123977	0	0.196561	0.175104
Ptgis	prostaglandin I2 (prostacyclin) synthase	1.47508	1.23977	0.683878	1.70353	1.22573
Ptgr1	prostaglandin reductase 1	0.913148	0.619883	0.410327	0.982804	0.466945
Ptgr2	prostaglandin reductase 2	84.3608	68.807	63.1219	70.1722	66.6563
Ptgs1	prostaglandin-endoperoxide synthase 1	23.4609	16.1169	14.9085	13.9558	14.592
Ptgs2	prostaglandin-endoperoxide synthase 2	10.3958	25.1052	28.4493	30.4014	23.7558
Sox2	SRY (sex determining region Y)-box 2	112.949	76.7415	61.549	76.2	69.6915
Tbxa2r	thromboxane A2 receptor	2.59896	0.991812	0.889041	0.786243	0.933889
Tbxas1	thromboxane A synthase 1, platelet	4.0038	2.91345	3.07745	3.21049	2.86004
