# Supplementary material for: Timapiprant, a prostaglandin D2 receptor antagonist, ameliorates pathology in a rat Alzheimer’s model
Source: Life Sci Alliance. 2022 Sep 27;5(12):e202201555. doi: 10.26508/lsa.202201555 (PMC9515385; doi:10.26508/lsa.202201555)
Supplement: Supplementary file 15 [file LSA-2022-01555_SdataF8.xlsx]

## Sheet: Fig8
	FL-APP/Actin			Aβ/GAPDH
	WT	Tg-AD		WT	Tg-AD
	0.781525	3.93549		1.7715	35.3431
	0.663402	7.90331		0.454896	46.071
	0.933905	5.76768		1.36108	60.5561
	2.07614	4.73987		0.646334	6.02251
	0.839928	4.70043		0.696504	8.75358
	0.705095	6.69322		1.06968	38.8788
