# Supplementary material for: Timapiprant, a prostaglandin D2 receptor antagonist, ameliorates pathology in a rat Alzheimer’s model
Source: Life Sci Alliance. 2022 Sep 27;5(12):e202201555. doi: 10.26508/lsa.202201555 (PMC9515385; doi:10.26508/lsa.202201555)
Supplement: Supplementary file 19 [file LSA-2022-01555_SdataFS12.xlsx]

## Sheet: Timapiprant Dosage FigS12
			WTTR n=9										TGTR n=9
	Cycle End Day
	0
	7		13.1473	11.907	10.5833	12.3611	11.8728	11.8163	12.659	13.2414	12.166		11.5986	11.9308	12.8322	10.2282	12.9655	11.7517	12.1325	11.3642	12.2947
	14		13.2214	11.8168	10.6027	12.3562	11.7093	11.7093	11.7183	12.169	12.0298		11.9582	12.2091	12.973	10.4595	12.4503	11.3907	11.7191	11.1572	11.9459
	21		18.8085	16.9362	14.2986	16.724	19.6571	19.7943	12.3478	12.8406	28.0342		11.864	12.1088	18.9804	15.4902	15.2551	13.8947	15.328	14.656	12.6761
	28		16.785	14.9533	13.8571	16.25	15.4667	15.5378	17.1542	17.791	15.9223		16.5234	16.785	17.7297	14.2703	17.28	15.7156	17.1786	16.3214	16.0711
	35		21.0698	18.9767	20.9351	24.052	24.6154	24.7273	20.7143	21.3333	19.9761		20.5	20.9546	20.04	15.76	19.6219	18.0696	18.52	19.2	23.6433
	42		18.2626	16.1212	15.1698	17.6981	16.1086	16.0362	16.2233	16.6326	16.3512		16.036	16.3604	17.7143	14.1071	17.0925	15.859	16.2857	17	17.8732
	49		14.1732	12.7244	16.2828	18.9495	16.7887	16.5634	16.7136	17.1643	18.5792		15.9646	16.3894	18	14.25	17.4222	16.1422	16.2832	17.0266	17.9029
	56		18.0594	16.4356	16.6904	19.2893	16.8111	16.4793	16.8638	17.2019	16.7882		14.2703	14.5174	15.5114	12.2443	15.0606	13.8182	13.4783	13.942	16.9774
	63		17.327	15.5829	16.3168	19.0495	17.7171	17.6	16.8224	17.5327	16.4251		16.8688	17.0498	19.4554	15.1737	18.3063	16.7207	18.9851	19.4229	17.1222
	70		18	16.1569	17.913	20.1304	16.6154	16.3982	18.6939	19.1429	17.732		18.2416	18.3961	20.532	16.197	19.0654	17.4579	18.243	18.5047	16.8496
	77		18.4523	16.5628	16.8163	18.898	17.4028	17.1754	16.553	17.106	16.84		17.3521	17.5399	18.5936	14.6484	18.2342	16.5766	17.0357	17.3571	17.1215
	84		20.3011	18.2366	16.597	18.7861	18.1748	17.8252	17.5769	18.1154	18.383		17.045	17.2613	18.5339	14.8054	17.9736	16.3524	15.2988	15.7769	17.7143
	91		18.1154	16.3462	15.2727	17.1273	17.0909	16.8	18	18.549	16.3865		16.8496	17.0266	18.2857	14.6786	18.0885	16.4602	17.3929	17.8571	16.4581
	98		17.6449	16.0748	15.115	17.0266	16.9912	16.4248	16.8688	17.2308	16.5825		16.9557	17.0266	18.5	14.8214	17.9286	16.25	17.3451	17.7699	17.4206
	105		20.8261	19.0435	16.9901	19.3663	19.32	18.76	19.7474	20.1684	19.7029		17.3694	17.6577	18.3929	14.6429	17.6	16.0711	17.1327	17.5575	18.2308
	112		14.2353	12.9412	12.0702	13.9509	13.614	13.221	13.8235	14	13.9837		13.3878	13.5238	14.0671	11.302	11.5429	10.3771	11.7237	12.036	13.2962
	119		14.0073	12.8645	12.4604	14.2446	13.3425	12.9863	13.1189	13.3986	12.5502		13.7063	13.8741	14.1892	11.3784	13.9073	12.4768	14.8401	15.1673	12.0379
	126		13.6224	12.3357	12.2797	13.7622	13.6307	13.2962	13.2404	13.5749	12.5294		13.4335	13.57	13.8808	11.1788	14.0397	12.5563	12.9389	13.2476	13.2587
	133		13.9787	12.6406	13.3034	14.8614	13.9574	13.5036	14.6154	15.0769	13.25		14.6716	14.8192	14.16	11.3867	14.16	12.7467	13.7409	13.4219	13.2962
