# Supplementary material for: Timapiprant, a prostaglandin D2 receptor antagonist, ameliorates pathology in a rat Alzheimer’s model
Source: Life Sci Alliance. 2022 Sep 27;5(12):e202201555. doi: 10.26508/lsa.202201555 (PMC9515385; doi:10.26508/lsa.202201555)
Supplement: Supplementary file 20 [file LSA-2022-01555_SdataFS13.xlsx]

## Sheet: Timapiprant WeightChange FigS13
	Month
			WTTR n=9										TGTR n=9
	1	1	29	24	22	18	20	24	22	16	14		32	30	23	13	23	28	5	51	26
	2	2	33	27	31	36	34	33	37	37	22		47	40	40	23	38	38	19	59	35
	3	3	47	41	39	26	50	44	46	41	21		57	50	34	30	41	39	29	71	29
	4	4	54	55	52	50	67	56	56	47	19		71	65	47	40	55	45	41	81	39
